# Supplementary material for: Delineation of Tumor Migration Paths by Using a Bayesian Biogeographic Approach
Source: MDPI journal article supplement (doi:10.3390/cancers11121880), 2019-11-27
Supplement: s1 [file s1]

**Supplemental Table S1.** Comparison of the overall performances (F<sub>1</sub>-scores) between the four seeding scenarios for each analyzed approach. The z-scores are shown below the diagonal, and the corresponding P values are shown above the diagonal.

| <b>BBM</b>     |      |             |             |             |
|----------------|------|-------------|-------------|-------------|
|                | mS   | pS          | pM          | pR          |
| mS             |      | <b>0.06</b> | 0.00        | 0.00        |
| pS             | 1.93 |             | <b>0.14</b> | <b>0.11</b> |
| pM             | 3.49 | 1.45        |             | <b>0.40</b> |
| pR             | 4.04 | 1.61        | 0.00        |             |
| <b>PMH-con</b> |      |             |             |             |
| mS             |      | <b>0.18</b> | 0.00        | 0.01        |
| pS             | 1.26 |             | <b>0.12</b> | <b>0.16</b> |
| pM             | 2.98 | 1.55        |             | <b>0.38</b> |
| pR             | 2.84 | 1.34        | -0.27       |             |
| <b>PMH-TR</b>  |      |             |             |             |
| mS             |      | <b>0.27</b> | 0.00        | 0.00        |
| pS             | 0.87 |             | 0.03        | 0.01        |
| pM             | 3.26 | 2.24        |             | <b>0.34</b> |
| pR             | 3.82 | 2.77        | 0.57        |             |

mS, monoclonal single-source seeding; pS, polyclonal single-source seeding; pM, polyclonal multi-source seeding; and pR, polyclonal reseeding
