# Supplementary material for: Delineation of Tumor Migration Paths by Using a Bayesian Biogeographic Approach
Source: MDPI journal article supplement (doi:10.3390/cancers11121880), 2019-11-27
Supplement: s1 [file s1]

**Supplemental Table S2.** Datasets information regarding the number of anatomical (tumor) sites, clones, and SNVs included. Datasets in which a clone from a metastatic tumor site was found at the root at the rest of datasets are marked in boldface.

| Dataset_ID        | Anatomical_sites | Clones | SNVs |
|-------------------|------------------|--------|------|
| m5Mseed694        | 5                | 14     | 41   |
| m8Rseed1070       | 8                | 18     | 81   |
| m5Sseed17         | 5                | 11     | 44   |
| m8mSseed10        | 8                | 18     | 43   |
| m5mSseed9         | 5                | 7      | 9    |
| m5Mseed865        | 5                | 10     | 34   |
| m8mSseed2         | 9                | 14     | 27   |
| m8Rseed394        | 9                | 20     | 38   |
| <b>m8Mseed241</b> | 8                | 20     | 67   |
| <b>m8Mseed45</b>  | 8                | 19     | 93   |
| m8Sseed2          | 8                | 20     | 64   |
| <b>m5Sseed25</b>  | 5                | 12     | 26   |
| m8mSseed7         | 8                | 20     | 50   |
| m5Mseed565        | 5                | 12     | 35   |
| m8Rseed383        | 8                | 25     | 83   |
| m8mSseed3         | 9                | 24     | 61   |
| m5Rseed17         | 6                | 15     | 53   |
| m5mSseed5         | 5                | 13     | 36   |
| m8Sseed54         | 8                | 19     | 70   |
| <b>m5Mseed473</b> | 7                | 19     | 73   |
| <b>m5mSseed0</b>  | 5                | 16     | 35   |
| m8Rseed30342      | 8                | 18     | 50   |
| m8mSseed8         | 9                | 24     | 78   |
| <b>m5Sseed81</b>  | 5                | 16     | 32   |
| m5mSseed2         | 5                | 10     | 16   |
| m8Sseed5          | 8                | 24     | 67   |
| m5Sseed32         | 5                | 11     | 46   |
| m5Mseed512        | 5                | 14     | 47   |
| m5mSseed10        | 5                | 12     | 22   |
| <b>m5Sseed23</b>  | 5                | 13     | 50   |
| m5mSseed12        | 5                | 11     | 19   |
| m8Rseed905        | 8                | 18     | 54   |
| m5Rseed538        | 5                | 15     | 55   |
| <b>m8Mseed35</b>  | 9                | 21     | 65   |
| m5Sseed49         | 5                | 12     | 27   |
| m8Mseed7          | 8                | 22     | 66   |
| m8Sseed0          | 10               | 24     | 65   |
| m8Rseed157        | 11               | 28     | 68   |
| m5Rseed247        | 5                | 15     | 42   |

|                     |    |    |    |
|---------------------|----|----|----|
| m5Mseed76           | 5  | 16 | 52 |
| m5mSseed3           | 6  | 22 | 53 |
| m5mSseed8           | 5  | 15 | 53 |
| <b>m8mSseed0</b>    | 9  | 23 | 50 |
| m5Mseed907          | 6  | 14 | 73 |
| m8Rseed981          | 9  | 20 | 99 |
| <b>m8Rseed9</b>     | 8  | 18 | 66 |
| <b>m8Mseed243</b>   | 9  | 23 | 74 |
| m8Sseed69           | 8  | 17 | 64 |
| m5Rseed571          | 6  | 14 | 36 |
| m8Sseed31           | 8  | 18 | 50 |
| m5Sseed40           | 6  | 16 | 46 |
| m5Rseed955          | 5  | 13 | 32 |
| m8Mseed172          | 10 | 26 | 64 |
| m5Mseed534          | 5  | 12 | 33 |
| m5Rseed950          | 7  | 15 | 38 |
| m8mSseed5           | 8  | 18 | 52 |
| m5Sseed62           | 5  | 14 | 31 |
| <b>m8Mseed239</b>   | 8  | 17 | 65 |
| m8Rseed10157        | 8  | 25 | 47 |
| m5Mseed209          | 5  | 14 | 51 |
| m5Rseed981          | 5  | 16 | 61 |
| m8Sseed35           | 8  | 24 | 75 |
| m5Sseed31           | 5  | 14 | 35 |
| m8Mseed76           | 9  | 19 | 77 |
| m5mSseed7           | 5  | 13 | 35 |
| m8mSseed12          | 9  | 17 | 48 |
| m5mSseed4           | 5  | 12 | 33 |
| m5Sseed35           | 5  | 15 | 41 |
| m8Mseed216          | 8  | 21 | 58 |
| m8mSseed4           | 8  | 19 | 60 |
| m8Mseed19           | 8  | 18 | 54 |
| <b>m5Rseed2155</b>  | 7  | 16 | 48 |
| m5Rseed1140         | 5  | 12 | 19 |
| m8Sseed12           | 8  | 21 | 36 |
| m5Rseed518          | 5  | 13 | 52 |
| m5Mseed545          | 6  | 16 | 46 |
| <b>m8Rseed10046</b> | 8  | 21 | 75 |
| <b>m8mSseed9</b>    | 9  | 18 | 32 |
| m8Sseed37           | 8  | 19 | 71 |
